# Supplementary material for: Precipitable Water Characteristics during the 2013 Colorado Flood using Ground-Based GPS Measurements
Source: Copernicus journal article supplement (doi:10.5194/amt-2016-414), 2017-02-14
Supplement: Supplementary file [file amt-2016-414-AC1-supplement.pdf]

**1. “I would just ask the authors to again address the question of saturation in the atmosphere. As I noted in my first revision, the atmosphere is simply not saturated from the surface to the “top” of the atmosphere. You have to emphasize that you are making this assumption (which is TOTALLY unrealistic). It may be a question of semantics, but the atmosphere cannot saturate from the surface upwards, it would be radically unstable, and would not last a minute in that configuration. I ask that you at least note this assumption directly in the text. You don’t have to change any of your calculations or figures, but just state explicitly that this is not a realistic assumption.”**

We thank the reviewer for reminding us of this point. The sentence “Note that a fully saturated atmosphere is an unrealistic assumption for a real atmosphere, but can be used for a simplified comparison” was added to Lines 306-308 to clarify that our assumption was unrealistic.
